# Supplementary material for: Association of e-Cigarette Advertising, Parental Influence, and Peer Influence With US Adolescent e-Cigarette Use
Source: PubMed Central journal article supplement (PMC9523494; doi:10.1001/jamanetworkopen.2022.33938), 2022-09-29
Supplement: jamanetwopen-e2233938-s001.pdf [file jamanetwopen-e2233938-s001.pdf]

## Supplemental Online Content

Wang Y, Duan Z, Weaver SR, et al. Association of e-cigarette advertising, parental influence, and peer influence with US adolescent e-cigarette use. *JAMA Netw Open*. 2022;5(9):e2233938. doi:10.1001/jamanetworkopen.2022.33938

**eFigure.** Flowchart of Analytical Sample

**eTable.** Descriptive Statistics of Study Sample

This supplemental material has been provided by the authors to give readers additional information about their work.

**eFigure 1.** Flowchart of Analytical Sample

eFigure 1a. Analytical sample that involves all adolescent participants across the PATH study Wave 4, 4.5 and 5

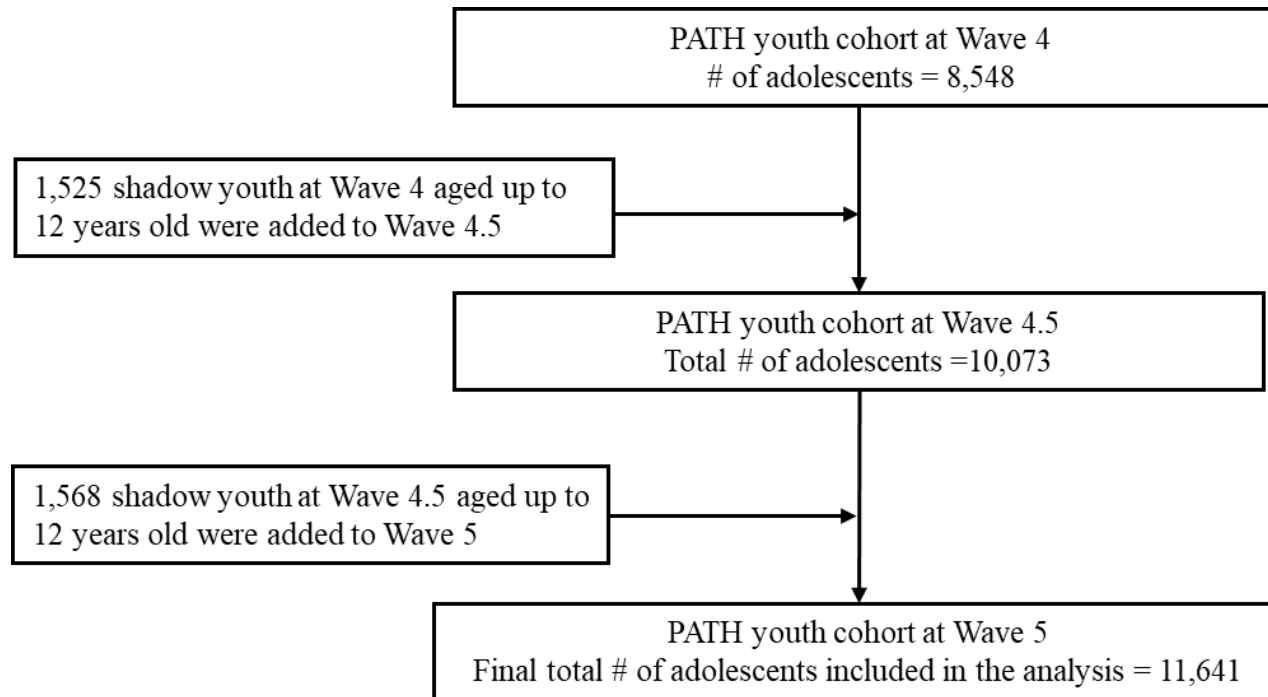

eFigure 1b. Analytical sample that involves adolescent never e-cigarette users across the PATH study Wave 4, 4.5, and 5

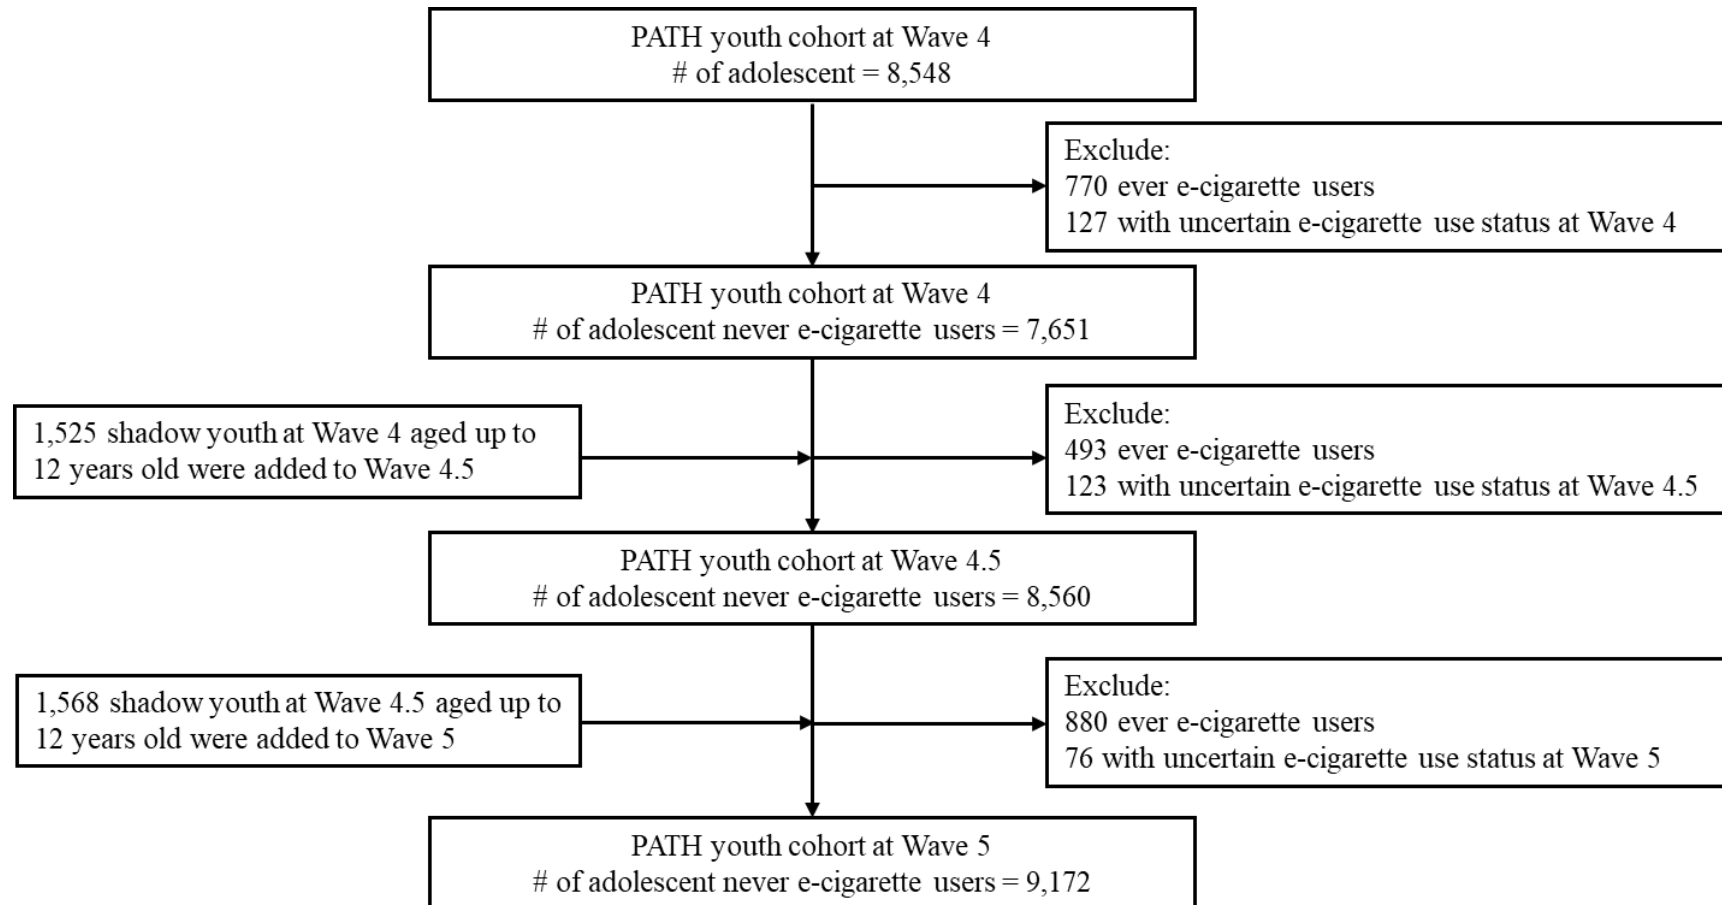

Note: Adolescent never e-cigarette users were used to estimate the prevalence of e-cigarette advertising exposure among this subgroup, and the contemporary association between exposures and curiosity in using e-cigarettes. Adolescent e-cigarette never users at baseline waves (Wave 4 for Wave 4-4.5 analysis, and Wave 4.5 for Wave 4.5-5 analysis) were used to examine the longitudinal associations between exposures and e-cigarette initiation at 1-year follow-up.

**eTable 1.** Descriptive Statistics of Study Sample

|                                                  | Wave 4 (N = 8,548) |             | Wave 4.5 (N = 10,073) |             | Wave 5 (N = 11,641) |             |
|--------------------------------------------------|--------------------|-------------|-----------------------|-------------|---------------------|-------------|
|                                                  | n (weighted %)     | 95% CI      | n (weighted %)        | 95% CI      | n (weighted %)      | 95% CI      |
| Sex                                              |                    |             |                       |             |                     |             |
| Boy                                              | 4,425 (51.1%)      | 50.0 - 52.2 | 5,225 (51.1%)         | 50.0 - 52.2 | 6,063 (51.1%)       | 50.1 - 52.1 |
| Girl                                             | 4,090 (48.9%)      | 47.8 - 50.0 | 4,810 (48.9%)         | 47.8 - 50.0 | 5,531 (48.9%)       | 47.9 - 49.9 |
| Age in years                                     |                    |             |                       |             |                     |             |
| 12                                               | 1,935 (24.9%)      | 23.9 - 25.9 | 1,523 (19.5%)         | 18.6 - 20.5 | 1,624 (17.3%)       | 16.5 - 18.1 |
| 13                                               | 2,179 (24.7%)      | 23.7 - 25.7 | 1,985 (20.5%)         | 19.7 - 21.4 | 1,474 (15.7%)       | 14.9 - 16.5 |
| 14                                               | 2,232 (24.8%)      | 23.8 - 25.8 | 2,196 (20.0%)         | 19.2 - 20.9 | 2,030 (17.5%)       | 16.7 - 18.2 |
| 15                                               | 2,074 (24.1%)      | 23.2 - 25.1 | 2,226 (19.8%)         | 19.0 - 20.7 | 2,181 (16.4%)       | 15.8 - 17.2 |
| 16                                               | 128 (1.5%)         | 1.3 - 1.9   | 2,067 (19.3%)         | 18.5 - 20.1 | 2,217 (16.6%)       | 15.9 - 17.3 |
| 17                                               | -                  | -           | 76 (0.8%)             | 0.6 - 1.0   | 2,115 (16.5%)       | 15.8 - 17.2 |
| Race/ethnicity                                   |                    |             |                       |             |                     |             |
| Black                                            | 1,105 (13.0%)      | 12.2 - 13.8 | 1,245 (12.7%)         | 12.0 - 13.4 | 1,405 (12.7%)       | 12.1 - 13.5 |
| Hispanic                                         | 2,515 (24.4%)      | 23.4 - 25.3 | 2,917 (24.7%)         | 23.8 - 25.5 | 3,375 (25.0%)       | 24.2 - 25.9 |
| White                                            | 3,702 (52.3%)      | 51.2 - 53.5 | 4,453 (51.9%)         | 50.8 - 53.0 | 5,185 (51.4%)       | 50.4 - 52.5 |
| Other <sup>a</sup>                               | 817 (10.3%)        | 9.6 - 11.1  | 970 (10.7%)           | 10.0 - 11.4 | 1,111 (10.8%)       | 10.1 - 11.5 |
| Parental education                               |                    |             |                       |             |                     |             |
| Less than high school                            | 1,582 (15.9%)      | 15.1 - 16.7 | 1,724 (14.8%)         | 14.1 - 15.5 | 2,000 (15.2%)       | 14.6 - 15.9 |
| High school graduate                             | 1,506 (16.7%)      | 15.9 - 17.5 | 1,778 (17.0%)         | 16.3 - 17.9 | 2,040 (16.8%)       | 16.0 - 17.5 |
| Some college or associate degree                 | 2,665 (30.9%)      | 29.8 - 32.0 | 3,148 (31.0%)         | 30.0 - 32.0 | 3,617 (30.9%)       | 30.0 - 31.9 |
| Bachelor's degree or above                       | 2,727 (36.6%)      | 35.4 - 37.7 | 3,318 (37.2%)         | 36.1 - 38.2 | 3,907 (37.1%)       | 36.1 - 38.0 |
| Severity of internalizing mental health problems |                    |             |                       |             |                     |             |
| Low                                              | 4,247 (49.9%)      | 48.7 - 51.0 | 4,885 (49.2%)         | 48.1 - 50.2 | 5,381 (47.3%)       | 46.3 - 48.3 |
| Moderate                                         | 2,370 (28.6%)      | 27.6 - 29.7 | 2,746 (28.0%)         | 27.1 - 29.0 | 3,103 (28.0%)       | 27.1 - 28.9 |
| High                                             | 1,834 (21.5%)      | 20.6 - 22.5 | 2,318 (22.8%)         | 21.9 - 23.7 | 2,840 (24.7%)       | 23.9 - 25.6 |
| Severity of externalizing mental health problems |                    |             |                       |             |                     |             |
| Low                                              | 3,350 (38.9%)      | 37.8 - 40.0 | 4,108 (41.2%)         | 40.1 - 42.2 | 4,674 (41.2%)       | 40.3 - 42.2 |
| Moderate                                         | 2,389 (29.3%)      | 28.3 - 30.4 | 2,707 (27.9%)         | 27.0 - 28.9 | 3,128 (27.8%)       | 26.9 - 28.7 |
| High                                             | 2,648 (31.8%)      | 30.7 - 32.8 | 3,077 (30.9%)         | 29.9 - 31.9 | 3,454 (30.9%)       | 30.0 - 31.9 |
| Parental e-cigarette use                         |                    |             |                       |             |                     |             |
| Yes                                              | 330 (3.9%)         | 3.5 - 4.4   | 353 (3.7%)            | 3.3 - 4.1   | 599 (5.2%)          | 4.8 - 5.6   |
| No                                               | 8,159 (96.1%)      | 95.6 - 96.5 | 9,618 (96.3%)         | 95.9 - 96.7 | 10,970 (94.8%)      | 94.4 - 95.2 |
| Friends using e-cigarettes                       |                    |             |                       |             |                     |             |
| None                                             | 7,165 (84.3%)      | 83.4 - 85.1 | 7,329 (73.3%)         | 72.4 - 74.2 | 7,270 (63.4%)       | 62.5 - 64.4 |

|                                         | Wave 4 (N = 8,548) |             | Wave 4.5 (N = 10,073) |             | Wave 5 (N = 11,641) |             |
|-----------------------------------------|--------------------|-------------|-----------------------|-------------|---------------------|-------------|
|                                         | n (weighted %)     | 95% CI      | n (weighted %)        | 95% CI      | n (weighted %)      | 95% CI      |
| A few                                   | 939 (11.0%)        | 10.3 - 11.7 | 1,652 (16.5%)         | 15.7 - 17.3 | 2,549 (21.8%)       | 21.0 - 22.6 |
| Some                                    | 254 (3.1%)         | 2.7 - 3.6   | 609 (6.0%)            | 5.5 - 6.5   | 977 (8.2%)          | 7.7 - 8.8   |
| Most                                    | 107 (1.3%)         | 1.1 - 1.6   | 332 (3.4%)            | 3.0 - 3.8   | 642 (5.4%)          | 5.0 - 5.9   |
| All                                     | 30 (0.3%)          | 0.2 - 0.4   | 79 (0.8%)             | 0.7 - 1.1   | 142 (1.1%)          | 0.9 - 1.3   |
| Perception of harm from e-cigarette use |                    |             |                       |             |                     |             |
| No harm                                 | 157 (1.8%)         | 1.5 - 2.1   | 213 (2.1%)            | 1.8 - 2.4   | 169 (1.4%)          | 1.2 - 1.6   |
| Little harm                             | 850 (10.2%)        | 9.5 - 10.9  | 1,020 (10.3%)         | 9.7 - 11.0  | 1,088 (9.3%)        | 8.7 - 9.9   |
| Some harm                               | 2,558 (30.3%)      | 29.3 - 31.4 | 3,112 (31.1%)         | 30.1 - 32.1 | 3,413 (29.0%)       | 28.1 - 29.9 |
| A lot of harm                           | 4,912 (57.6%)      | 56.5 - 58.8 | 5,626 (56.5%)         | 55.5 - 57.6 | 6,909 (60.3%)       | 59.3 - 61.3 |
| Ever e-cigarette use                    |                    |             |                       |             |                     |             |
| Yes                                     | 770 (9.0%)         | 8.4 - 9.7   | 1,390 (13.5%)         | 12.8 - 14.2 | 2,393 (19.9%)       | 19.1 - 20.6 |
| No                                      | 7,651 (91.0%)      | 90.3 - 91.6 | 8,560 (86.5%)         | 85.8 - 87.2 | 9,172 (80.1%)       | 79.4 - 80.9 |
| Current e-cigarette use                 |                    |             |                       |             |                     |             |
| Yes                                     | 193 (2.4%)         | 2.0 - 2.7   | 528 (5.2%)            | 4.8 - 5.7   | 1,049 (8.7%)        | 8.1 - 9.2   |
| No                                      | 8,324 (97.6%)      | 97.3 - 98.0 | 9,520 (94.8%)         | 94.3 - 95.2 | 10,549 (91.3%)      | 90.8 - 91.9 |
| Current cigarette smoking               |                    |             |                       |             |                     |             |
| Yes                                     | 115 (1.3%)         | 1.1 - 1.6   | 212 (2.0%)            | 1.7 - 2.3   | 288 (2.3%)          | 2.0 - 2.6   |
| No                                      | 8,421 (98.7%)      | 98.4 - 98.9 | 9,844 (98.0%)         | 97.7 - 98.3 | 11,339 (97.7%)      | 97.4 - 98.0 |
| Current use of other tobacco products   |                    |             |                       |             |                     |             |
| Yes                                     | 94 (1.2%)          | 1.0 - 1.5   | 153 (1.5%)            | 1.3 - 1.8   | 199 (1.6%)          | 1.4 - 1.9   |
| No                                      | 8,343 (98.8%)      | 98.5 - 99.0 | 9,787 (98.5%)         | 98.2 - 98.7 | 11,298 (98.4%)      | 98.1 - 98.6 |

<sup>a</sup> Other included non-Hispanic American Indian or Alaska Native, Asian Indian, Chinese, Filipino, Japanese, Korean, Vietnamese, other Asian, Native Hawaiian, Guamanian or Chamorro, Samoan, and other Pacific Islanders.
